# Supplementary material for: Elucidation of the interaction effect between dietary fiber and bound polyphenol components on the anti-hyperglycemic activity of tea residue dietary fiber
Source: Royal Society of Chemistry journal article supplement (doi:10.1039/d1fo03682c), 2022-01-01
Supplement: d1fo03682c1.pdf [file d1fo03682c1.pdf]

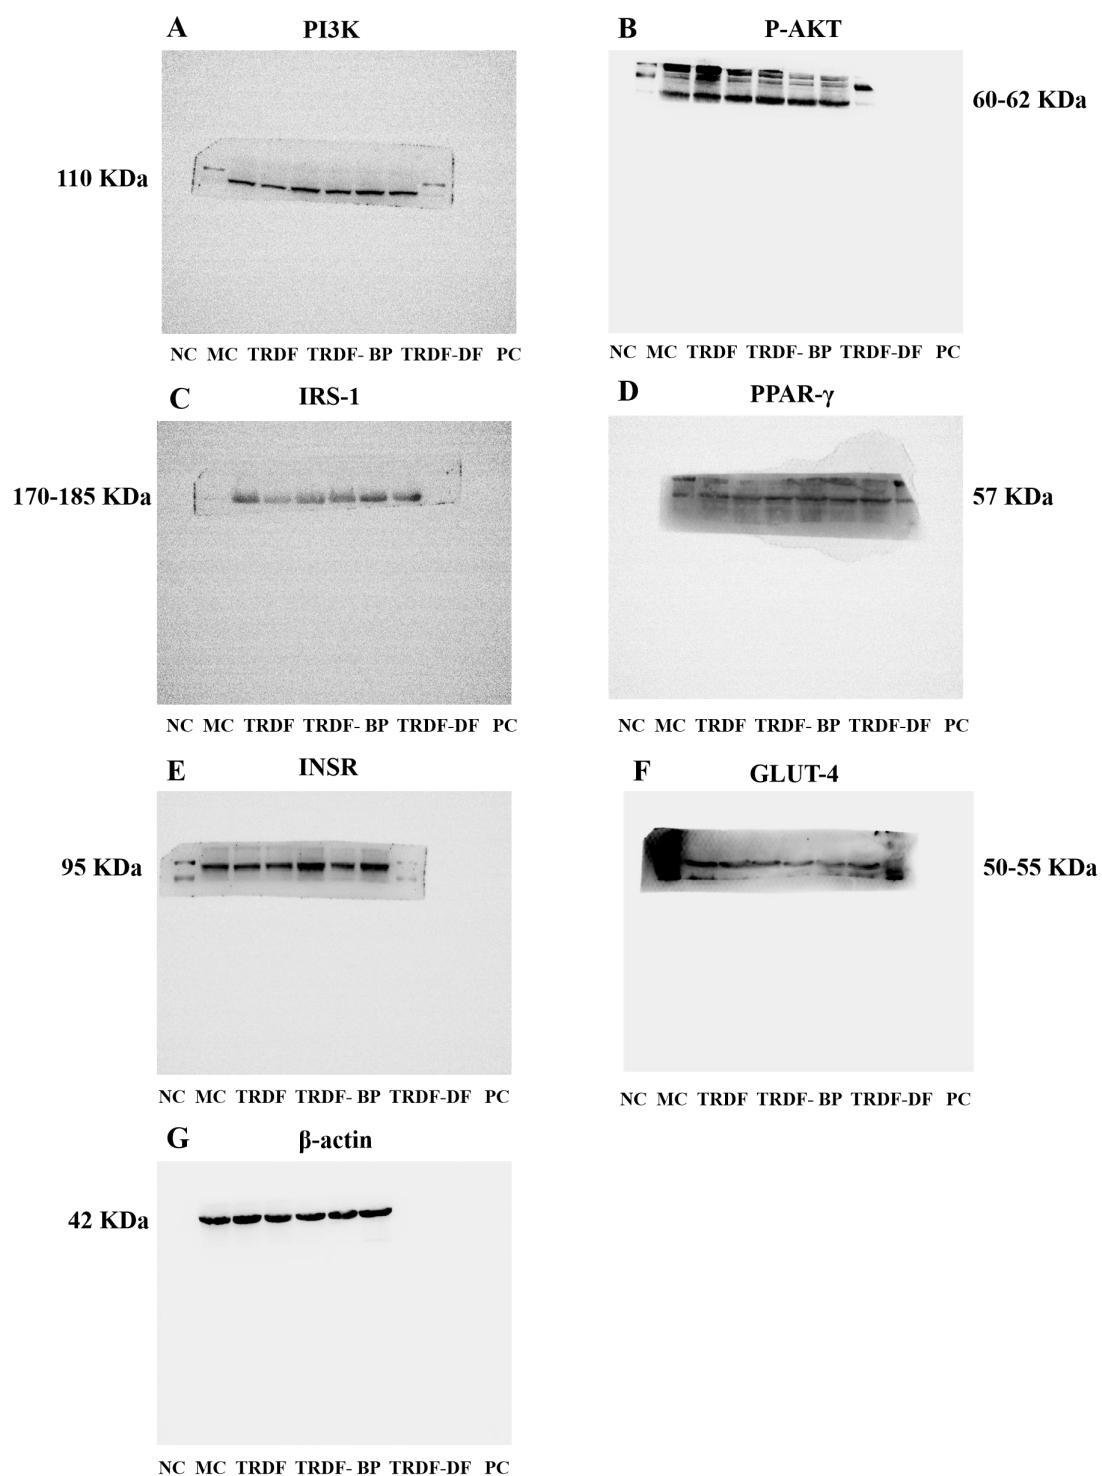

**Figure S1** The the underlying raw images with the full gel and blot, unprocessed and unprocessed of insulin signaling pathway-related proteins in liver. (A) PI3K, (B) P-AKT, (C) IRS-1, (D) PPAR- $\gamma$ , (E) INSR, (F) GLUT-4, (G)  $\beta$ -actin.
